# Supplementary material for: Efficacy of a Low-Cost Bubble CPAP System in Treatment of Respiratory Distress in a Neonatal Ward in Malawi
Source: PLOS journal article supplement (doi:10.1371/journal.pone.0086327), 2014-01-29
Supplement: S2 (10.1371/journal.pone.0086327.s002) [file journal.pone.0086327.s002]

**Table S1:** Fraction of eligible participants in each treatment group who experienced minor complications during treatment.

| <b>Complication</b>                      | Nasal Oxygen | bCPAP     | Transitioned from nasal oxygen to bCPAP |
|------------------------------------------|--------------|-----------|-----------------------------------------|
| Mild facial irritation, < 1 day duration | 3 (12%)      | 1 (1.9%)  | 0 (0.0%)                                |
| Mild nasal irritation, <3 day duration   | 1 (4.0%)     | 7 (13.2%) | 2 (22.2%)                               |
| Mild epistaxis                           | 1 (4.0%)     | 6 (11.3%) | 2 (22.2%)                               |
